# Supplementary material for: Real ribozymes suggest a relaxed error threshold
Source: Springer Nature journal article supplement (doi:10.1038/ng1621), 2005-08-28
Supplement: 41588_2005_BFng1621_MOESM1_ESM.pdf [file 41588_2005_BFng1621_MOESM1_ESM.pdf]

**Supplementary Table 1:** Mutations of the *Neurospora* VS Ribozyme

| <b>Symbol of the Mutation<sup>(1)</sup></b> | <b>krel<sup>(2)</sup></b> | <b>Length<sup>(3)</sup></b> | <b>Type<sup>(4)</sup></b> | <b>Location<sup>(5)</sup></b> | <b>Ref. <sup>(6)</sup></b> |
|---------------------------------------------|---------------------------|-----------------------------|---------------------------|-------------------------------|----------------------------|
| Original sequence                           | 1.00000                   | 144                         | original                  |                               |                            |
| inverse A652                                | 0.00000                   | 144                         | B                         | II                            | 1                          |
| A652C                                       | 0.17000                   | 144                         | B                         | II                            | 1                          |
| A652G                                       | 0.00000                   | 144                         | B                         | II                            | 2                          |
| A652U                                       | 0.24000                   | 144                         | B                         | II                            | 1                          |
| Δ A652                                      | 0.01300                   | 143                         | B                         | II                            | 3                          |
| Δ A652                                      | 0.00000                   | 143                         | B                         | II                            | 2                          |
| G650C, C773G                                | 1.27000                   | 144                         | BP                        | II                            | 2                          |
| G653C, C771G                                | 0.09000                   | 144                         | BP                        | II                            | 2                          |
| G655C, C769G                                | 1.77670                   | 144                         | BP                        | II                            | 3                          |
| G655C, C769G                                | 1.32000                   | 144                         | BP                        | II                            | 2                          |
| +650G, +772C                                | 1.10000                   | 136                         | L                         | II                            | 1                          |
| +653G, +770C                                | 0.00560                   | 136                         | L                         | II                            | 1                          |
| C769G                                       | 0.18000                   | 144                         | MP                        | II                            | 2                          |
| C771G                                       | 0.00000                   | 144                         | MP                        | II                            | 2                          |
| C773G                                       | 0.29000                   | 144                         | MP                        | II                            | 2                          |
| G650C                                       | 0.12000                   | 144                         | MP                        | II                            | 2                          |
| G653C                                       | 0.00000                   | 144                         | MP                        | II                            | 2                          |
| G655C                                       | 0.00000                   | 144                         | MP                        | II                            | 2                          |
| inverse A718                                | 0.12000                   | 144                         | B                         | III                           | 4                          |
| Δ A718                                      | 0.01500                   | 143                         | B                         | III                           | 2                          |
| Δ A718                                      | 0.14000                   | 143                         | B                         | III                           | 4                          |
| inverse stem III                            | 0.04000                   | 144                         | B                         | III                           | 4                          |
| A661U, C662G, G716C, U717A                  | 0.08000                   | 144                         | BP                        | III                           | 2                          |
| A661U,U717A                                 | 0.60000                   | 144                         | BP                        | III                           | 4                          |
| C658G, G721C                                | 1.34951                   | 144                         | BP                        | III                           | 3                          |
| C660G, G719C                                | 1.20000                   | 144                         | BP                        | III                           | 4                          |
| C662G, G716C                                | 0.94000                   | 144                         | BP                        | III                           | 2                          |
| C662G,G716C                                 | 0.60000                   | 144                         | BP                        | III                           | 4                          |
| C663G,G715C                                 | 0.27000                   | 144                         | BP                        | III                           | 4                          |
| inverse stem III, except the adenine bulge  | 0.50000                   | 144                         | BP                        | III                           | 4                          |
| U659A,A720U                                 | 1.19000                   | 144                         | BP                        | III                           | 2                          |
| U659A,A720U                                 | 0.80000                   | 144                         | BP                        | III                           | 4                          |
| +A after C660                               | 0.77000                   | 145                         | L                         | III                           | 4                          |
| Length 10 stem III                          | 0.00000                   | 151                         | L                         | III                           | 4                          |
| Length 5 stem III 5                         | 0.00000                   | 141                         | L                         | III                           | 4                          |
| Length 6 stem III                           | 0.14000                   | 143                         | L                         | III                           | 4                          |

| <b>Symbol of the Mutation<sup>(1)</sup></b> | <b>krel<sup>(2)</sup></b> | <b>Length<sup>(3)</sup></b> | <b>Type<sup>(4)</sup></b> | <b>Location<sup>(5)</sup></b> | <b>Ref. <sup>(6)</sup></b> |
|---------------------------------------------|---------------------------|-----------------------------|---------------------------|-------------------------------|----------------------------|
| Length 7 stem III                           | 0.85000                   | 145                         | L                         | III                           | 4                          |
| Length 8 stem III                           | 0.09000                   | 147                         | L                         | III                           | 4                          |
| Length 9 stem III                           | 0.00370                   | 149                         | L                         | III                           | 4                          |
| A661U, C662G                                | 0.06000                   | 144                         | MP                        | III                           | 2                          |
| A720U                                       | 0.05000                   | 144                         | MP                        | III                           | 2                          |
| C662G                                       | 0.23000                   | 144                         | MP                        | III                           | 2                          |
| G716C                                       | 0.21000                   | 144                         | MP                        | III                           | 2                          |
| G716C, U717A                                | 0.02000                   | 144                         | MP                        | III                           | 2                          |
| U659A                                       | 0.00000                   | 144                         | MP                        | III                           | 2                          |
| C666G,G685C                                 | 0.03000                   | 144                         | BP                        | IV                            | 4                          |
| U670A, C672G, G679C, A681U                  | 0.88000                   | 144                         | BP                        | IV                            | 2                          |
| Length 2 stem IV                            | 0.01200                   | 132                         | L                         | IV                            | 4                          |
| Length 4 stem IV                            | 0.61000                   | 136                         | L                         | IV                            | 4                          |
| Length 6 stem IV                            | 0.49000                   | 140                         | L                         | IV                            | 4                          |
| G679C, A681U                                | 0.00000                   | 144                         | MP                        | IV                            | 2                          |
| U670A, C672G                                | 0.54000                   | 144                         | MP                        | IV                            | 2                          |
| C632A,G697U                                 | 0.03000                   | 144                         | CS                        | I-V                           | 5                          |
| C632G,G697C                                 | 0.42600                   | 144                         | CS                        | I-V                           | 5                          |
| C632U,G697A                                 | 0.23000                   | 144                         | CS                        | I-V                           | 5                          |
| G630A,C699U                                 | 0.23800                   | 144                         | CS                        | I-V                           | 5                          |
| G630C,C699G                                 | 0.00600                   | 144                         | CS                        | I-V                           | 5                          |
| G630U,C699A                                 | 0.00100                   | 144                         | CS                        | I-V                           | 5                          |
| U631A,A698U                                 | 0.02400                   | 144                         | CS                        | I-V                           | 5                          |
| U631C,A698G                                 | 0.43500                   | 144                         | CS                        | I-V                           | 5                          |
| U631G,A698C                                 | 0.00700                   | 144                         | CS                        | I-V                           | 5                          |
| A656C                                       | 0.00291                   | 144                         | CS                        | J236                          | 3                          |
| A656C, G768A                                | 0.00000                   | 144                         | CS                        | J236                          | 3                          |
| A656C, G768U                                | 0.00194                   | 144                         | CS                        | J236                          | 3                          |
| A656G                                       | 0.06117                   | 144                         | CS                        | J236                          | 3                          |
| A656G, G768A                                | 0.86408                   | 144                         | CS                        | J236                          | 3                          |
| A656G, G768U                                | 0.00583                   | 144                         | CS                        | J236                          | 3                          |
| A656U                                       | 0.00194                   | 144                         | CS                        | J236                          | 3                          |
| A656U, G768A                                | 0.01553                   | 144                         | CS                        | J236                          | 3                          |
| A656U, G768U                                | 0.00000                   | 144                         | CS                        | J236                          | 3                          |
| A657U                                       | 0.06311                   | 144                         | CS                        | J236                          | 3                          |
| Δ A656                                      | 0.00000                   | 143                         | CS                        | J236                          | 3                          |
| G768U                                       | 0.01553                   | 144                         | CS                        | J236                          | 3                          |
| Δ A656, A767                                | 0.00000                   | 142                         | L                         | J236                          | 3                          |
| Δ A767                                      | 0.00068                   | 143                         | L                         | J236                          | 3                          |

| <b>Symbol of the Mutation<sup>(1)</sup></b> | <b>krel<sup>(2)</sup></b> | <b>Length<sup>(3)</sup></b> | <b>Type<sup>(4)</sup></b> | <b>Location<sup>(5)</sup></b> | <b>Ref. <sup>(6)</sup></b> |
|---------------------------------------------|---------------------------|-----------------------------|---------------------------|-------------------------------|----------------------------|
| A764U                                       | 0.87379                   | 144                         | SS                        | J236                          | 3                          |
| A766U                                       | 0.05437                   | 144                         | SS                        | J236                          | 3                          |
| A767U                                       | 0.04757                   | 144                         | SS                        | J236                          | 3                          |
| C765U                                       | 0.54369                   | 144                         | SS                        | J236                          | 3                          |
| G768A                                       | 0.57282                   | 144                         | SS                        | J236                          | 3                          |
| A712G                                       | 0.00600                   | 144                         | CS                        | J345                          | 4                          |
| A712U                                       | 0.00500                   | 144                         | CS                        | J345                          | 4                          |
| C665A                                       | 0.01500                   | 144                         | CS                        | J345                          | 4                          |
| C665G                                       | 0.01000                   | 144                         | CS                        | J345                          | 2                          |
| C665G, G711C                                | 0.01000                   | 144                         | CS                        | J345                          | 2                          |
| Δ U686                                      | 0.00000                   | 143                         | CS                        | J345                          | 4                          |
| U686A                                       | 0.00600                   | 144                         | CS                        | J345                          | 4                          |
| U710A                                       | 0.00200                   | 144                         | CS                        | J345                          | 4                          |
| U710C                                       | 0.03000                   | 144                         | CS                        | J345                          | 4                          |
| U713A                                       | 0.02000                   | 144                         | CS                        | J345                          | 4                          |
| U714A                                       | 0.14000                   | 144                         | CS                        | J345                          | 4                          |
| G711C                                       | 1.00000                   | 144                         | SS                        | J345                          | 2                          |
| G711U                                       | 0.90000                   | 144                         | SS                        | J345                          | 4                          |
| U664A                                       | 0.12000                   | 144                         | SS                        | J345                          | 4                          |
| A690U, C692G, G704C, U706A                  | 1.48000                   | 144                         | BP                        | V                             | 2                          |
| A693U, G694, C702G, U703A                   | 0.31000                   | 144                         | BP                        | V                             | 2                          |
| C687G,G709C                                 | 0.00800                   | 144                         | BP                        | V                             | 4                          |
| U695G, A701C                                | 1.67000                   | 144                         | BP                        | V                             | 2                          |
| A698C                                       | 0.04100                   | 144                         | CS                        | V                             | 5                          |
| A698G                                       | 0.00000                   | 144                         | CS                        | V                             | 5                          |
| A698U                                       | 0.00000                   | 144                         | CS                        | V                             | 5                          |
| C699A                                       | 0.00600                   | 144                         | CS                        | V                             | 5                          |
| C699G                                       | 0.00000                   | 144                         | CS                        | V                             | 5                          |
| C699U                                       | 0.01800                   | 144                         | CS                        | V                             | 5                          |
| G697A                                       | 0.00000                   | 144                         | CS                        | V                             | 5                          |
| G697C                                       | 0.00000                   | 144                         | CS                        | V                             | 5                          |
| G697U                                       | 0.00100                   | 144                         | CS                        | V                             | 5                          |
| Length 10 stem V                            | 0.03100                   | 146                         | L                         | V                             | 4                          |
| Length 11 stem V                            | 0.00320                   | 148                         | L                         | V                             | 4                          |
| Length 12 stem V                            | 0.00000                   | 150                         | L                         | V                             | 4                          |
| Length 13 stem V                            | 0.00000                   | 152                         | L                         | V                             | 4                          |
| Length 3 stem V                             | 0.00000                   | 132                         | L                         | V                             | 4                          |
| Length 5 stem V                             | 0.00000                   | 136                         | L                         | V                             | 4                          |
| Length 7 stem V                             | 0.04700                   | 140                         | L                         | V                             | 4                          |

| <b>Symbol of the Mutation<sup>(1)</sup></b> | <b>krel<sup>(2)</sup></b> | <b>Length<sup>(3)</sup></b> | <b>Type<sup>(4)</sup></b> | <b>Location<sup>(5)</sup></b> | <b>Ref. <sup>(6)</sup></b> |
|---------------------------------------------|---------------------------|-----------------------------|---------------------------|-------------------------------|----------------------------|
| A690U, C692G                                | 0.07000                   | 144                         | MP                        | V                             | 2                          |
| A701C                                       | 0.04000                   | 144                         | MP                        | V                             | 2                          |
| G704C, U706A                                | 0.78000                   | 144                         | MP                        | V                             | 2                          |
| U695G                                       | 0.06000                   | 144                         | MP                        | V                             | 2                          |
| U696A                                       | 0.03000                   | 144                         | MP                        | V                             | 5                          |
| U696C                                       | 0.18300                   | 144                         | MP                        | V                             | 5                          |
| U696G                                       | 0.02400                   | 144                         | MP                        | V                             | 5                          |
| U705C                                       | 0.90000                   | 144                         | RB                        | V                             | 4                          |
| U708C                                       | 0.90000                   | 144                         | RB                        | V                             | 4                          |
| inverse A725,A726                           | 0.00280                   | 144                         | B                         | VI                            | 1                          |
| A725C                                       | 1.60000                   | 144                         | B                         | VI                            | 1                          |
| A725G                                       | 0.05500                   | 144                         | B                         | VI                            | 1                          |
| A725U                                       | 1.50000                   | 144                         | B                         | VI                            | 1                          |
| A726C                                       | 1.70000                   | 144                         | B                         | VI                            | 1                          |
| A726G                                       | 1.20000                   | 144                         | B                         | VI                            | 1                          |
| A726U                                       | 1.10000                   | 144                         | B                         | VI                            | 1                          |
| Δ A725                                      | 0.17000                   | 143                         | B                         | VI                            | 1                          |
| Δ A725,A726                                 | 0.00710                   | 142                         | B                         | VI                            | 1                          |
| Δ A725, inverse A726                        | 0.04300                   | 143                         | B                         | VI                            | 1                          |
| Δ A725,A726C                                | 1.60000                   | 143                         | B                         | VI                            | 1                          |
| Δ A725,A726G                                | 0.25000                   | 143                         | B                         | VI                            | 1                          |
| Δ A725,A726U                                | 0.37000                   | 143                         | B                         | VI                            | 1                          |
| A735U, U737A, A748U, U750A                  | 1.15000                   | 144                         | BP                        | VI                            | 2                          |
| C723G,G762C                                 | 0.84000                   | 144                         | BP                        | VI                            | 1                          |
| C731A,G754U                                 | 0.12000                   | 144                         | BP                        | VI                            | 6                          |
| C731G,G754C                                 | 0.04200                   | 144                         | BP                        | VI                            | 1                          |
| C731U,G754A                                 | 0.30000                   | 144                         | BP                        | VI                            | 6                          |
| G722C, C723G, G762C, C763G                  | 0.75000                   | 144                         | BP                        | VI                            | 2                          |
| G722C, C763G                                | 0.81553                   | 144                         | BP                        | VI                            | 3                          |
| G722C,C763G                                 | 0.84000                   | 144                         | BP                        | VI                            | 1                          |
| G727C, U728A, A759U, C760G                  | 0.94000                   | 144                         | BP                        | VI                            | 2                          |
| G727C,C760G                                 | 0.35000                   | 144                         | BP                        | VI                            | 1                          |
| G729C,C758G                                 | 0.43000                   | 144                         | BP                        | VI                            | 1                          |
| G732U,U753G,G733U,U752G                     | 0.47000                   | 144                         | BP                        | VI                            | 1                          |
| U724A, A761U                                | 0.21000                   | 144                         | BP                        | VI                            | 1                          |
| U728A,A759U                                 | 1.30000                   | 144                         | BP                        | VI                            | 1                          |
| A730C                                       | 0.05500                   | 144                         | CS                        | VI                            | 1                          |
| A730G                                       | 0.01100                   | 144                         | CS                        | VI                            | 1                          |
| A730U                                       | 0.03600                   | 144                         | CS                        | VI                            | 1                          |

| Symbol of the Mutation <sup>(1)</sup>               | $k_{rel}$ <sup>(2)</sup> | Length <sup>(3)</sup> | Type <sup>(4)</sup> | Location <sup>(5)</sup> | Ref. <sup>(6)</sup> |
|-----------------------------------------------------|--------------------------|-----------------------|---------------------|-------------------------|---------------------|
| A756C                                               | 0.00190                  | 144                   | CS                  | VI                      | 7                   |
| A756C                                               | 0.00190                  | 144                   | CS                  | VI                      | 1                   |
| A756G                                               | 0.00270                  | 144                   | CS                  | VI                      | 7                   |
| A756G                                               | 0.00270                  | 144                   | CS                  | VI                      | 1                   |
| A756U                                               | 0.00130                  | 144                   | CS                  | VI                      | 7                   |
| A756U                                               | 0.00130                  | 144                   | CS                  | VI                      | 1                   |
| substitution of the active site with a A-C basepair | 0.00000                  | 142                   | CS                  | VI                      | 8                   |
| C755A                                               | 0.84000                  | 144                   | CS                  | VI                      | 1                   |
| C755G                                               | 0.02000                  | 144                   | CS                  | VI                      | 1                   |
| C755U                                               | 0.17000                  | 144                   | CS                  | VI                      | 1                   |
| G757A                                               | 0.04400                  | 144                   | CS                  | VI                      | 1                   |
| G757C                                               | 0.01500                  | 144                   | CS                  | VI                      | 1                   |
| G757U                                               | 0.01800                  | 144                   | CS                  | VI                      | 1                   |
| Length 2 stem VI.c                                  | 0.46000                  | 128                   | L                   | VI                      | 1                   |
| Length 4 stem VI.c                                  | 0.70000                  | 132                   | L                   | VI                      | 1                   |
| Length 6 stem VI.c                                  | 1.00000                  | 136                   | L                   | VI                      | 1                   |
| Length 8 stem VI.c                                  | 0.97000                  | 140                   | L                   | VI                      | 1                   |
| A735U, U737A                                        | 0.25000                  | 144                   | MP                  | VI                      | 2                   |
| A748U, U750A                                        | 0.28000                  | 144                   | MP                  | VI                      | 2                   |
| A759U, C760G                                        | 0.00000                  | 144                   | MP                  | VI                      | 2                   |
| C731A                                               | 0.01500                  | 144                   | MP                  | VI                      | 6                   |
| C731G                                               | 0.03900                  | 144                   | MP                  | VI                      | 6                   |
| C731U                                               | 0.03900                  | 144                   | MP                  | VI                      | 6                   |
| G722C, C723G                                        | 0.00000                  | 144                   | MP                  | VI                      | 2                   |
| G727C, U728A                                        | 0.00000                  | 144                   | MP                  | VI                      | 2                   |
| G754A                                               | 0.02500                  | 144                   | MP                  | VI                      | 6                   |
| G754C                                               | 0.01200                  | 144                   | MP                  | VI                      | 6                   |
| G754U                                               | 0.02200                  | 144                   | MP                  | VI                      | 6                   |
| G762C, C763G                                        | 0.00000                  | 144                   | MP                  | VI                      | 2                   |
| U752C                                               | 0.80000                  | 144                   | RB                  | VI                      | 1                   |
| U752C,U753C                                         | 0.52000                  | 144                   | RB                  | VI                      | 1                   |
| U753C                                               | 0.42000                  | 144                   | RB                  | VI                      | 1                   |

<sup>(1)</sup> **Symbol of the mutation:** We used the conventional descriptions of the mutations. For a point mutation the original nucleotide is listed first, the location (position) of the mutation second, and then the nucleotide to which the original was replaced. So for example the mutation C713A means that cytosine at position 713 is replaced by an adenine. Deletions begin with a  $\Delta$  symbol, followed by the position and the original nucleotide, thus the mutation  $\Delta$  A718 means that the adenine at position 718 is deleted.

If there is more than one mutation in a mutant, then the mutations are comma separated. Some deletions and insertions have textual descriptions see the references for the exact sequence.

<sup>(2)</sup> **Relative enzymatic activity ( $k_{rel}$ ):** The relative activity is the ratio of the enzymatic activity of the mutant and the wild-type ribozyme.

<sup>(3)</sup> **Length:** The length of the ribozyme.

<sup>(4)</sup> **Type of mutation:** Based on structural changes and activity loss, we can discern the following types of mutations:

*Base pair change (BP):* The base pair is either reversed or changed to another base pair. The structure does not change.

*Mutation affecting a single stranded region (SS):* The point mutation affects one of the single stranded regions of the ribozyme, for example the internal loops, the junctions or the hairpins at the end of the stems. The structure does not change.

*Mispair (MP):* The mutation disrupts one of the base pairs, so the pair could not form and the structure of the molecule changes locally (an internal bulge is formed).

*Restoration of a base pair (RB):* A GU wobble pair is changed to one of the canonical base pairs (AU or GC).

*Mutation affecting a critical site (CS):* The mutation affects one of the critical sites of the ribozyme. Structure does not change, but the enzymatic activity is reduced considerably.

*Mutations affecting a bulge (B):* The mutation affects one of the adenine bulges. The mutation can be a deletion, a point mutation or the inverting the bulge (i.e. putting it to the opposite strand).

*Change in length (L):* The mutation is either a deletion or an insertion.

<sup>(5)</sup> **Location of the mutation:** The stem (II, III, IV, V or VI) or junction (J236 or J345) where the mutation occurs.

<sup>(6)</sup> **Reference:** The source of information for the given ribozyme.

1. Lafontaine, D.A., Wilson, T.J., Norman, D.G. & Lilley, D.M.J. The A730 loop is an important component of the active site of the VS ribozyme. *Journal of Molecular Biology* **312**, 663-674 (2001).
2. Beattie, T.L., Olive, J.E. & Collins, R.A. A secondary-structure model for the self-cleaving region of the *Neurospora* VS RNA. *Proc. Natl. Acad. Sci. USA* **92**, 4686-4690 (1995).
3. Lafontaine, D.A., Norman, D.G. & Lilley, D.M.J. Structure, folding and activity of the VS ribozyme: importance of the 2-3-6 helical junction. *The EMBO Journal* **20**, 1415-1424 (2001).
4. Lafontaine, D.A., Norman, D.G. & Lilley, D.M.J. The global structure of the VS ribozyme. *The EMBO Journal* **21**, 2461-2471 (2002).
5. Rastogi, T., Beattie, T.L., Olive, J.E. & Collins, R.A. A long-range pseudoknot is required for activity of the *Neurospora* VS ribozyme. *The EMBO Journal* **15**, 2820-2825 (1996).
6. Lafontaine, D.A., Wilson, T.J., Zhao, Z.-Y. & Lilley, D.M.J. Functional group requirements in the probable active site of the VS ribozyme. *Journal of Molecular Biology* **323**, 23-34 (2002).
7. Lafontaine, D.A., Norman, D.G. & Lilley, D.M.J. Folding and catalysis by the VS ribozyme. *Biochimie* **84**, 889-896 (2002).
8. Sood, V.D. & Collins, R.A. Identification of the catalytic subdomain of the VS ribozyme and evidence for remarkable sequence tolerance in the active site loop. *Journal of Molecular Biology* **320**, 443-454 (2002).
