# Supplementary material for: Real ribozymes suggest a relaxed error threshold
Source: Springer Nature journal article supplement (doi:10.1038/ng1621), 2005-08-28
Supplement: 41588_2005_BFng1621_MOESM2_ESM.pdf [file 41588_2005_BFng1621_MOESM2_ESM.pdf]

**Supplementary Table 2:** Mutations of the Hairpin Ribozyme

| <b>Symbol of the Mutation<sup>(1)</sup></b>                                    | <b><math>k_{rel}</math><sup>(2)</sup></b> | <b>Length<sup>(3)</sup></b> | <b>Type<sup>(4)</sup></b> | <b>Location<sup>(5)</sup></b> | <b>Ref.<sup>(6)</sup></b> |
|--------------------------------------------------------------------------------|-------------------------------------------|-----------------------------|---------------------------|-------------------------------|---------------------------|
| c+4a; u+5a; g+6c                                                               | 0.0000                                    | 50                          | MP                        | H1                            | 1                         |
| G6A                                                                            | 0.0000                                    | 50                          | MP                        | H1                            | 1                         |
| G6C                                                                            | 0.0000                                    | 50                          | MP                        | H1                            | 1                         |
| G6U                                                                            | 0.0000                                    | 50                          | MP                        | H1                            | 1                         |
| u+7a, u+8a, u+9a                                                               | 1.3182                                    | 50                          | MP                        | H1                            | 1                         |
| u+9a                                                                           | 0.6818                                    | 50                          | MP                        | H1                            | 1                         |
| a-3c; U12G                                                                     | 1.0000                                    | 50                          | BP                        | H2                            | 2                         |
| a-3g; U12C                                                                     | 3.0000                                    | 50                          | BP                        | H2                            | 2                         |
| a-3u; U12A                                                                     | 1.0000                                    | 50                          | BP                        | H2                            | 2                         |
| c-2a, a-3c                                                                     | 0.0000                                    | 50                          | MP                        | H2                            | 1                         |
| G11A                                                                           | 0.0000                                    | 50                          | MP                        | H2                            | 1                         |
| G11C                                                                           | 0.0000                                    | 50                          | MP                        | H2                            | 1                         |
| G11U                                                                           | 0.0000                                    | 50                          | MP                        | H2                            | 1                         |
| g-4c, u-5a                                                                     | 0.0364                                    | 50                          | MP                        | H2                            | 1                         |
| U12A                                                                           | 0.05-0.2                                  | 50                          | MP                        | H2                            | 1                         |
| u-5a                                                                           | 1.1364                                    | 50                          | MP                        | H2                            | 1                         |
| $\Delta$ C13; $\Delta$ A14                                                     | >1.0000                                   | 48                          | L                         | H2                            | 3                         |
| $\Delta$ U12; $\Delta$ C13; $\Delta$ A14                                       | 0.9000                                    | 47                          | L                         | H2                            | 3                         |
| $\Delta$ A1; $\Delta$ A2; $\Delta$ A3; $\Delta$ C4; $\Delta$ C13; $\Delta$ A14 | 0.9000                                    | 44                          | L                         | H2                            | 3                         |
| $\Delta$ A1                                                                    | >1.0000                                   | 49                          | L                         | H2                            | 3                         |
| $\Delta$ A1; $\Delta$ A2                                                       | >1.0000                                   | 48                          | L                         | H2                            | 3                         |
| $\Delta$ A1; $\Delta$ A2; $\Delta$ A3                                          | >1.0000                                   | 47                          | L                         | H2                            | 3                         |
| $\Delta$ A1; $\Delta$ A2; $\Delta$ A3; $\Delta$ C4                             | >1.0000                                   | 46                          | L                         | H2                            | 3                         |
| $\Delta$ A14                                                                   | >1.0000                                   | 49                          | L                         | H2                            | 3                         |
| A15G                                                                           | 0.8000                                    | 50                          | MP                        | H3                            | 4                         |
| A15U; U49A                                                                     | 1.1500                                    | 50                          | BP                        | H3                            | 5                         |
| A18G; C17A; U46C; G47U                                                         | 0.6000                                    | 50                          | BP                        | H3                            | 4                         |
| A18U                                                                           | 0.0500                                    | 50                          | MP                        | H3                            | 4                         |
| A50G                                                                           | 0.7500                                    | 50                          | SS                        | H3                            | 5                         |
| C16G; G48C                                                                     | 0.0000                                    | 50                          | BP                        | H3                            | 5                         |
| C17A; G47C                                                                     | 0.0500                                    | 50                          | MP                        | H3                            | 4                         |
| C17G                                                                           | 0.0000                                    | 50                          | MP                        | H3                            | 5,6                       |
| C17G; G47C                                                                     | 0.2100                                    | 50                          | BP                        | H3                            | 5                         |
| C17U; G47C                                                                     | 0.1000                                    | 50                          | MP                        | H3                            | 4                         |
| C18U; G47C                                                                     | 0.0500                                    | 50                          | MP                        | H3                            | 4                         |
| $\Delta$ A50                                                                   | 0.4900                                    | 49                          | L                         | H3                            | 5                         |
| $\Delta$ U49; $\Delta$ A50                                                     | 0.3800                                    | 48                          | L                         | H3                            | 5                         |

| <b>Symbol of the Mutation<sup>(1)</sup></b> | <b><math>k_{rel}</math><sup>(2)</sup></b> | <b>Length<sup>(3)</sup></b> | <b>Type<sup>(4)</sup></b> | <b>Location<sup>(5)</sup></b> | <b>Ref.<sup>(6)</sup></b> |
|---------------------------------------------|-------------------------------------------|-----------------------------|---------------------------|-------------------------------|---------------------------|
| G19C                                        | 0.0100                                    | 50                          | MP                        | H3                            | 5                         |
| G19C; C45G                                  | 0.2500                                    | 50                          | BP                        | H3                            | 5                         |
| G19U                                        | 0.0500                                    | 50                          | MP                        | H3                            | 4                         |
| G19U; C45A; C16U; G48A; A15U; U49A          | 0.9000                                    | 50                          | BP                        | H3                            | 4                         |
| G19U; C45G; C17U; G47A; A15G; U49C          | 0.7000                                    | 50                          | BP                        | H3                            | 4                         |
| G47C                                        | 0.0000                                    | 50                          | MP                        | H3                            | 5,6                       |
| G48C                                        | 0.0000                                    | 50                          | MP                        | H3                            | 5                         |
| U46A                                        | 0.1000                                    | 50                          | MP                        | H3                            | 4                         |
| U49A                                        | 0.8000                                    | 50                          | MP                        | H3                            | 5                         |
| U49C                                        | 0.6000                                    | 50                          | MP                        | H3                            | 5                         |
| A28U; U34A                                  | 1.1300                                    | 50                          | BP                        | H4                            | 5                         |
| A30C                                        | 0.0462                                    | 50                          | SS                        | H4                            | 6                         |
| C27A; G35U                                  | 0.8500                                    | 50                          | BP                        | H4                            | 4                         |
| C27G                                        | 0.0000                                    | 50                          | MP                        | H4                            | 5,6                       |
| C27G; G35C                                  | 0.1000                                    | 50                          | BP                        | H4                            | 6                         |
| C27G; G35C                                  | 0.1000                                    | 50                          | BP                        | H4                            | 5,6                       |
| C27G; G35U                                  | 0.5000                                    | 50                          | MP                        | H4                            | 4                         |
| C27U; G35C                                  | 0.4500                                    | 50                          | MP                        | H4                            | 4                         |
| C29A                                        | 0.5000                                    | 50                          | MP                        | H4                            | 4                         |
| C29G; G33C                                  | 0.1200                                    | 50                          | BP                        | H4                            | 5                         |
| C29G; G35C                                  | 0.0000                                    | 50                          | MP                        | H4                            | 5                         |
| G33C                                        | 0.1000                                    | 50                          | MP                        | H4                            | 5                         |
| G33U                                        | 0.7000                                    | 50                          | MP                        | H4                            | 4                         |
| G35A                                        | 0.1000                                    | 50                          | MP                        | H4                            | 4                         |
| G35C                                        | 0.0200                                    | 50                          | MP                        | H4                            | 4                         |
| G35C                                        | 0.0000                                    | 50                          | MP                        | H4                            | 5                         |
| G35U                                        | 0.0200                                    | 50                          | MP                        | H4                            | 4                         |
| U34A                                        | 0.1100                                    | 50                          | MP                        | H4                            | 5                         |
| A10C                                        | 0.0000                                    | 50                          | SS                        | LA                            | 7                         |
| A10G                                        | 0.0493                                    | 50                          | SS                        | LA                            | 7                         |
| A10U                                        | 0.0000                                    | 50                          | SS                        | LA                            | 7                         |
| A7C                                         | 0.1644                                    | 50                          | SS                        | LA                            | 7                         |
| A7C; A20C                                   | 1.0400                                    | 50                          | SS                        | LA                            | 5                         |
| A7G                                         | 0.5205                                    | 50                          | SS                        | LA                            | 7                         |
| A7U                                         | 0.2603                                    | 50                          | SS                        | LA                            | 7                         |
| A9C                                         | 0.0056                                    | 50                          | SS                        | LA                            | 7                         |
| A9G                                         | 0.0019                                    | 50                          | SS                        | LA                            | 7                         |
| A9U                                         | 0.0014                                    | 50                          | SS                        | LA                            | 5,7                       |
| G8A                                         | 0.0000                                    | 50                          | SS                        | LA                            | 7                         |

| Symbol of the Mutation <sup>(1)</sup> | $k_{rel}$ <sup>(2)</sup> | Length <sup>(3)</sup> | Type <sup>(4)</sup> | Location <sup>(5)</sup> | Ref. <sup>(6)</sup> |
|---------------------------------------|--------------------------|-----------------------|---------------------|-------------------------|---------------------|
| G8C                                   | 0.0000                   | 50                    | SS                  | LA                      | 5,7                 |
| G8U                                   | 0.0000                   | 50                    | SS                  | LA                      | 7                   |
| u+2a                                  | 0.0742                   | 50                    | SS                  | LA                      | 8                   |
| u+2c                                  | 0.0142                   | 50                    | SS                  | LA                      | 8                   |
| u+2g                                  | 0.0250                   | 50                    | SS                  | LA                      | 8                   |
| A20C                                  | 0.8100                   | 50                    | SS                  | LB                      | 2,5                 |
| A20G                                  | 0.4041                   | 50                    | SS                  | LB                      | 2,6                 |
| A20U                                  | 1.3699                   | 50                    | SS                  | LB                      | 2,6                 |
| A22C                                  | 0.0000                   | 50                    | SS                  | LB                      | 6                   |
| A22G                                  | 0.0000                   | 50                    | SS                  | LB                      | 6                   |
| A22U                                  | 0.0000                   | 50                    | SS                  | LB                      | 6                   |
| A23C                                  | 0.0000                   | 50                    | SS                  | LB                      | 6                   |
| A23G                                  | 0.0000                   | 50                    | SS                  | LB                      | 6                   |
| A23U                                  | 0.0000                   | 50                    | SS                  | LB                      | 6                   |
| A24C                                  | 0.0000                   | 50                    | SS                  | LB                      | 5,6                 |
| A24G                                  | 0.0055                   | 50                    | SS                  | LB                      | 6                   |
| A24G; U37C                            | 0.0000                   | 50                    | SS                  | LB                      | 5                   |
| A24U                                  | 0.0068                   | 50                    | SS                  | LB                      | 6                   |
| A26C                                  | 0.1781                   | 50                    | SS                  | LB                      | 6                   |
| A26G                                  | 0.0055                   | 50                    | SS                  | LB                      | 6                   |
| A26U                                  | 0.0082                   | 50                    | SS                  | LB                      | 6                   |
| A38C                                  | 0.0000                   | 50                    | SS                  | LB                      | 6                   |
| A38G                                  | 0.0000                   | 50                    | SS                  | LB                      | 6                   |
| A38U                                  | 0.0000                   | 50                    | SS                  | LB                      | 5,6                 |
| A40G                                  | 0.0031                   | 50                    | SS                  | LB                      | 6                   |
| A40U                                  | 0.0454                   | 50                    | SS                  | LB                      | 6                   |
| A40U                                  | 0.0300                   | 50                    | SS                  | LB                      | 5                   |
| A43C                                  | 0.0000                   | 50                    | SS                  | LB                      | 2,6                 |
| A43C; G21U                            | 0.0000                   | 50                    | SS                  | LB                      | 2                   |
| A43G                                  | 0.0846                   | 50                    | SS                  | LB                      | 6                   |
| A43G; G21U                            | 0.0000                   | 50                    | SS                  | LB                      | 2                   |
| A43U                                  | 0.0000                   | 50                    | SS                  | LB                      | 2,5                 |
| A43U; G21U                            | 0.0000                   | 50                    | SS                  | LB                      | 2                   |
| C25A                                  | 0.0000                   | 50                    | SS                  | LB                      | 6                   |
| C25G                                  | 0.0000                   | 50                    | SS                  | LB                      | 4,6                 |
| C25G; G36C                            | 0.0000                   | 50                    | BP                  | LB                      | 5                   |
| C25U                                  | 0.0000                   | 50                    | SS                  | LB                      | 6                   |
| C44A                                  | 0.6538                   | 50                    | SS                  | LB                      | 6                   |
| C44G                                  | 0.1000                   | 50                    | SS                  | LB                      | 6                   |

| Symbol of the Mutation <sup>(1)</sup> | $k_{rel}$ <sup>(2)</sup> | Length <sup>(3)</sup> | Type <sup>(4)</sup> | Location <sup>(5)</sup> | Ref. <sup>(6)</sup> |
|---------------------------------------|--------------------------|-----------------------|---------------------|-------------------------|---------------------|
| C44U                                  | 0.1000                   | 50                    | SS                  | LB                      | 6                   |
| Δ A24                                 | 0.0000                   | 49                    | L                   | LB                      | 4                   |
| Δ A26                                 | 0.0000                   | 49                    | L                   | LB                      | 5                   |
| Δ U42                                 | 0.0000                   | 49                    | L                   | LB                      | 5                   |
| G21A                                  | 0.0685                   | 50                    | SS                  | LB                      | 6                   |
| G21C                                  | 0.1301                   | 50                    | SS                  | LB                      | 2,6                 |
| G21U                                  | 0.0753                   | 50                    | SS                  | LB                      | 6                   |
| G21U; A20C                            | 0.1500                   | 50                    | SS                  | LB                      | 2                   |
| G21U; A20G                            | 0.0030                   | 50                    | SS                  | LB                      | 2                   |
| G21U; A20U                            | 0.0100                   | 50                    | SS                  | LB                      | 2                   |
| G36A                                  | 0.0269                   | 50                    | SS                  | LB                      | 6                   |
| G36C                                  | 0.0215                   | 50                    | SS                  | LB                      | 6                   |
| G36U                                  | 0.1231                   | 50                    | SS                  | LB                      | 6                   |
| U37A                                  | 0.7692                   | 50                    | SS                  | LB                      | 6                   |
| U37A; A43U                            | 0.0000                   | 50                    | SS                  | LB                      | 5                   |
| U37C                                  | 1.3077                   | 50                    | SS                  | LB                      | 6                   |
| U37G                                  | 0.3077                   | 50                    | SS                  | LB                      | 6                   |
| U39A                                  | 0.9231                   | 50                    | SS                  | LB                      | 6                   |
| U39C                                  | 0.6154                   | 50                    | SS                  | LB                      | 6                   |
| U39G                                  | 0.2462                   | 50                    | SS                  | LB                      | 6                   |
| U41A                                  | 0.0177                   | 50                    | SS                  | LB                      | 6                   |
| U41C                                  | 0.0923                   | 50                    | SS                  | LB                      | 6                   |
| U41G                                  | 0.0000                   | 50                    | SS                  | LB                      | 6                   |
| U42A                                  | 0.0015                   | 50                    | SS                  | LB                      | 6                   |
| U42C                                  | 0.0300                   | 50                    | SS                  | LB                      | 5                   |
| U42G                                  | 0.0000                   | 50                    | SS                  | LB                      | 6                   |
| U43U                                  | 0.0023                   | 50                    | SS                  | LB                      | 6                   |

<sup>(1)</sup> **Symbol of the mutation:** We used the conventional descriptions of the mutations. For a point mutation the original nucleotide is listed first, the location (position) of the mutation second, and then the nucleotide to which the original was replaced. So for example the mutation U42C means that uracil at position 42 is replaced by a cytosine. Deletions begin with a Δ symbol, followed by the position and the original nucleotide, thus the mutation Δ A50 means that the adenine at position 50 is deleted.

If there is more than one mutation in a mutant, then the mutations are comma separated. Some deletions and insertions have textual descriptions see the references for the exact sequence.

<sup>(2)</sup> **Relative enzymatic activity ( $k_{rel}$ ):** The relative activity is the ratio of the enzymatic activity of the mutant and the wild-type ribozyme.

<sup>(3)</sup> **Length:** The length of the ribozyme.

<sup>(4)</sup> **Type of mutation:** Based on structural changes and activity loss, we can discern the following types of mutations:

*Base pair change (BP):* The base pair is either reversed or changed to another base pair. The structure does not change. The base paired positions in the substrate binding regions are also considered base paired, and if the base pair is changed to another base-pair then it is listed as a BP mutation.

*Mutation affecting a single stranded region (SS):* The point mutation affects one of the single stranded regions of the ribozyme, mainly the two loops. The structure does not change.

*Mismatch (MP):* The mutation disrupts one of the base pairs, so the pair could not form and the structure of the molecule changes locally (an internal bulge is formed). The base paired positions in the substrate binding regions are also considered base paired, and if the base pair is perturbed it is listed as a MP mutation.

*Change in length (L):* The mutation is either a deletion or an insertion.

<sup>(5)</sup> **Location of the mutation:** The helical regions (H1, H2, H3, H4) or loop (LA or LB) where the mutation occurs.

<sup>(6)</sup> **Reference:** The source of information for the given ribozyme.

1. Joseph, S., Berzal-Herranz, A., Chowrira, B.M., Butcher, S.E. & Burke, J.M. Substrate selection rules for the hairpin ribozyme determined by in vitro selection, mutation, and analysis of mismatched substrates. *Genes & Development* **7**, 130-138 (1993).
2. Sargueil, B., McKenna, J. & Burke, J.M. Analysis of the functional role of GA sheared base pair by *in vitro* genetics. *Journal of Biological Chemistry* **275**, 32157-32166 (2000).
3. Pinard, R., Lambert, D., Pothiawala, G., Major, F. & Burke, J.M. Modifications and deletions of helices within the hairpin ribozyme-substrate complex: An active ribozyme lacking helix 1. *RNA* **10**, 395-402 (2004).
4. Berzal-Herranz, A., Joseph, S., Chowrira, B.M., Butcher, S.E. & Burke, J.M. Essential nucleotide sequences and secondary structure elements of the hairpin ribozyme. *The EMBO Journal* **12**, 2567-2574 (1993).
5. Anderson, P. et al. Mutagenesis of the hairpin ribozyme. *Nucleic Acid Research* **22**, 1096-1100 (1994).
6. Siwkowski, A., DeYoung, M.B., Anderson, P. & Hampel, A. Mutagenesis and modeling of the hairpin ribozyme family. *Methods in Molecular biology* **74**, 357-363 (1997).
7. Shippy, R., Siwkowski, A. & Hampel, A. Mutational analysis of loop 1 and 5 of the hairpin ribozyme. *Biochemistry* **37**, 564-570 (1998).
8. Walter, N.G., Chan, P.A., Hampel, A., Millar, D.P. & Burke, J.M. A base change in the catalytic core of the hairpin ribozyme perturbs function but not domain docking. *Biochemistry* **40**, 2580-2587 (2001).
